# Supplementary material
Source: PubMed Central journal article supplement (PMC3272386)

## Supplementary Material

Michaela Auer-Grumbach, Martin Weger, Regina Fink-Puches, Lea Papić, Eleonore Fröhlich,  
 Piet Auer-Grumbach, Laila El Shabrawi-Caelen, Maria Schabhüttl, Christian Windpassinger, Jan  
 Senderek, Herbert Budka, Slave Trajanoski, Andreas R. Janecke, Anton Haas, Dieter Metze,  
 Thomas R Pieber, Christian Guelly

**Supplementary Table 1** Primer pairs used to amplify the FBLN5 gene coding region.

| Name      |    | Primer                 |    |
|-----------|----|------------------------|----|
| FBLN5-1F  | 5´ | CCTCTGGAATAAAACACCCG   | 3´ |
| FBLN5-1rv | 5´ | AGGAATGAAGCGCTGAGAAT   | 3´ |
| FBLN5-2F  | 5´ | GTCTGGAACCACCATGACCT   | 3´ |
| FBLN5-2R  | 5´ | ACTGTAAAGCCACTCCCACC   | 3´ |
| FBLN5-3fw | 5´ | AAACCCTGAAACCTGTCTGC   | 3´ |
| FBLN5-3rv | 5´ | CCCCTCTCAGTGCTTAGCTC   | 3´ |
| FBLN5-4fw | 5´ | CCCACCACTCAATATTGCAA   | 3´ |
| FBLN5-4rv | 5´ | GGTGCATTGAATGGCAACTA   | 3´ |
| FBLN5-5F  | 5´ | TAGGATGGCAGAAGGATTCC   | 3´ |
| FBLN5-5R  | 5´ | CTTACTACCCTCAGGCAGCC   | 3´ |
| FBLN5-6F  | 5´ | GCCTTGTATTGAGACAGCA    | 3´ |
| FBLN5-6R  | 5´ | CACAAACATAAGCTGCCAGG   | 3´ |
| FBLN5-7F  | 5´ | AGATCATGCTCCCAAAGGTC   | 3´ |
| FBLN5-7R  | 5´ | TCCCAAAGTGGACATGTGTC   | 3´ |
| FBLN5-8F  | 5´ | TCCATTGCTAGAAGTGCTGG   | 3´ |
| FBLN5-8R  | 5´ | GAGCTGCCACTATGAGAGCC   | 3´ |
| FBLN5-9F  | 5´ | CTGTTGCTGCCATATTGGAT   | 3´ |
| FBLN5-9R  | 5´ | CATGACGTAGGTAGTAGGCCAG | 3´ |
| FBLN5-10F | 5´ | GCCAGGAGCAGAGACATTCT   | 3´ |
| FBLN5-10R | 5´ | GGCTCAGGAGGAGAAGCAT    | 3´ |
| FBLN5-11F | 5´ | GAAAGAGCATGGCACAGTTG   | 3´ |
| FBLN5-11R | 5´ | AATGCCTAACGTCTGTGTCG   | 3´ |

**Supplementary Table 2** Normal values of nerve conductions (range in brackets), amplitudes of motor nerves are peak-peak.

NCVs: nerve conduction studies; NCV: nerve conduction velocity in meter per second (m/sec);

NE: not examined; NR: no response

Motor median nerve: DL: 3.4-4.3 msec; AM: 4.8-10.0 mV; NCV: 48.0-60.0 m/sec

Sensory median nerve: AM: 10.0-30.0 $\mu$ V; NCV: 45.0-56.0 m/sec

Motor peroneal nerve: DL: 4.5-5.8 msec; AM: 4.5-9.0 mV; NCV: 44.0-50.0 m/sec

Sural nerve: AM: 8.0-20.0 $\mu$ V; NCV: 44.0-52.0 m/sec

| FAMILY AND MEMBER | FBLN5 SEQUENCE VARIATION | NCVs PERONEAL MOTOR/<br>SURAL NERVE<br>NCV-DL-AM//NCV | NCVs MEDIAN MOTOR/<br>SENSORY NERVE<br>NCV-DL-AM//NCV |
|-------------------|--------------------------|-------------------------------------------------------|-------------------------------------------------------|
| <b>Family A</b>   |                          |                                                       |                                                       |
| A11               | p.R373C                  | NR // NR                                              | NR // NR                                              |
| A14               | p.R373C                  | NE // NE                                              | 22.0-8.4-1.1 // NR                                    |
| A16               | p.R373C                  | 20.7-9.0-0.2 // NR                                    | NE//NE                                                |
| A17               | p.R373C                  | 21.0-6.4-5.0 // NR                                    | 28.0-7.0-11.0 // NR                                   |
| A22               | p.R373C                  | NE // NE                                              | 37.5-8.1-11.5 // NE                                   |
| A23               | p.R373C                  | 24.0-6.5-2.4 // NE                                    | 35.0-7.2-5.1 // 29.0                                  |
| <b>Family B</b>   |                          |                                                       |                                                       |
| B5                | p.R373C                  | NE // NE                                              | NE // NE                                              |
| B9                | p.R373C                  | NR // NR                                              | 23.8-7.4-8.4 // 27.9                                  |
| <b>Family C</b>   |                          |                                                       |                                                       |
| C1                | p.G90S                   | 35.5-8.2-0.1 // 51.6                                  | 52.6-3.8-1.6 // 65.1                                  |
| C2                | p.G90S                   | NR // NE                                              | NE-3.9-4.1 // 50.0                                    |
| C3                | p.G90S                   | 48.0-3.0-5.7 // NE                                    | 54.0-3.5-22.0 // 39.0                                 |
| C4                | p.G90S                   | 40.6-6.8-2.6 // NE                                    | 56.3-4.2-9.3 // NE                                    |
| C5                | p.G90S                   | 47.4-4.4-3.1 // NE                                    | 55.9-3.3-7.8 // 44.4                                  |
| <b>Family D</b>   |                          |                                                       |                                                       |
| D1                | p.V126M                  | 51.0-5.4-5.2 // 44.0                                  | 59.0-4.0-4.2 // 53.0                                  |
| D2                | p.V126M                  | 40.4-5.6-1.5 // NE                                    | 53.6-5.1-13.7 // NE                                   |
| <b>AMD-Pat</b>    |                          |                                                       |                                                       |
| E                 | p.V126M                  | NE // NE                                              | NE // NE                                              |
| F                 | p.V126M                  | 43.8-4.8-4.1 // NE                                    | NE // NE                                              |
| G                 | p.G90S                   | 34.2-5.0-0.8 // NE                                    | 46.2-4.0-3.6 // NE                                    |
| H                 | p.T48I                   | 44.0-4.5-5.3 // NE                                    | 58.0-4.8-4.6 // NE                                    |
| K                 | p.G267S                  | NE                                                    | NE                                                    |
| L                 | p.G267S                  | 40.3-5.6-0.9 // NR                                    | 56.7-4.5-9.0 // 50.7                                  |
| <b>Controls</b>   |                          |                                                       |                                                       |
| I                 | p.V126M                  | NR // NE                                              | 52.4-5.4-3.7 // NE                                    |
| J                 | p.V126M                  | 41.4-4.9-1.4 // NE                                    | 50.0-3.8-4.4 // NE                                    |

**Supplementary Table 3** Sequencing statistics and list of the observed High Confidence

Differences.

Variations are sorted based on their variation types; ns (non-synonymous) and s (synonymous).

Supplementary Table 3A

|                                    |          |
|------------------------------------|----------|
| <b>Total sequence information</b>  | 72.263Mb |
| <b>Capture Array Target Region</b> | 695.5kb  |
| <b>Disease linked exome size</b>   | 120.4kb  |
| Target bp with a coverage >10-fold | >91%     |
| <b>Total nr. of variants</b>       | 82       |
| <b>Variants in coding sequence</b> | 30       |
| <b>synonymous</b>                  | 18       |
| novel synonymous                   | 1        |
| <b>non- synonymous</b>             | 12       |
| novel non- synonymous              | 1        |

Supplementary Table 3B

| Reference Accno | Start Pos | End Pos  | Ref Nuc | Var Nuc | Total Depth | Var Freq | Ref AA | Var AA | Region Name | Known SNP's       | Variation Type |
|-----------------|-----------|----------|---------|---------|-------------|----------|--------|--------|-------------|-------------------|----------------|
| chr14           | 87470966  | 87470966 | T       | C       | 55          | 100%     | T      | A      | GALC        | rs421262          | ns             |
| chr14           | 87477641  | 87477641 | A       | G       | 30          | 37%      | I      | T      | GALC        | rs398607          | ns             |
| chr14           | 87932282  | 87932282 | G       | A       | 35          | 60%      | V      | M      | SPATA7      | rs3179969         | ns             |
| chr14           | 88008405  | 88008405 | A       | G       | 60          | 58%      | V      | A      | PTPN21      | rs2274736         | ns             |
| chr14           | 88016375  | 88016375 | G       | A       | 14          | 50%      | L      | F      | PTPN21      | rs2401751         | ns             |
| chr14           | 88275018  | 88275018 | T       | C       | 51          | 57%      | I      | V      | EML5        | rs17188228        | ns             |
| chr14           | 90712148  | 90712148 | G       | A       | 26          | 58%      | S      | N      | C14orf159   | rs34302825        | ns             |
| chr14           | 90808834  | 90808834 | A       | G       | 12          | 50%      | L      | P      | CCDC88C     | rs941920          | ns             |
| chr14           | 91338368  | 91338368 | T       | G       | 37          | 100%     | K      | T      | TC2N        | rs2402073         | ns             |
| chr14           | 91413652  | 91413652 | G       | A       | 25          | 48%      | R      | C      | FBLN5       | novel             | ns             |
| chr14           | 91510819  | 91510819 | C       | T       | 30          | 43%      | G      | S      | TRIP11      | rs1051340         | ns             |
| chr14           | 91575668  | 91575668 | T       | A       | 35          | 40%      | M      | L      | TRIP11      | rs17127898        | ns             |
| chr14           | 87477628  | 87477628 | T       | A       | 31          | 97%      | V      | V      | GALC        | rs421466          | s              |
| chr14           | 87481700  | 87481700 | T       | C       | 48          | 100%     | T      | T      | GALC        | rs367327          | s              |
| chr14           | 87501651  | 87501651 | C       | T       | 38          | 37%      | Q      | Q      | GALC        | rs12888666        | s              |
| chr14           | 87547166  | 87547166 | C       | T       | 74          | 100%     | T      | T      | GPR65       | rs6574978         | s              |
| chr14           | 87722142  | 87722142 | C       | T       | 23          | 65%      | A      | A      | KCNK10      | rs3742692         | s              |
| chr14           | 87763478  | 87763478 | G       | C       | 65          | 58%      | V      | V      | KCNK10      | rs2277524         | s              |
| chr14           | 88005678  | 88005678 | A       | G       | 57          | 58%      | T      | T      | PTPN21      | rs2297129         | s              |
| chr14           | 88015344  | 88015344 | A       | G       | 13          | 38%      | P      | P      | PTPN21      | rs879932          | s              |
| chr14           | 89799824  | 89799824 | C       | T       | 59          | 100%     | I      | I      | PSMC1       | rs11554757,rs4811 | s              |
| chr14           | 90193328  | 90193328 | T       | C       | 18          | 100%     | P      | P      | TTC7B       | rs3742660         | s              |
| chr14           | 90231615  | 90231615 | C       | T       | 27          | 63%      | T      | T      | TTC7B       | rs10146731        | s              |
| chr14           | 91017796  | 91017796 | T       | C       | 81          | 64%      | T      | T      | SMEK1       | rs17127374        | s              |
| chr14           | 91153757  | 91153757 | C       | G       | 42          | 55%      | V      | V      | CATSPERB    | rs1620238         | s              |
| chr14           | 91157769  | 91157769 | G       | A       | 36          | 47%      | I      | I      | CATSPERB    | rs1296082         | s              |
| chr14           | 91321340  | 91321340 | A       | G       | 44          | 48%      | L      | L      | TC2N        | novel             | s              |
| chr14           | 91417433  | 91417433 | A       | G       | 20          | 45%      | I      | I      | FBLN5       | rs2430347         | s              |
| chr14           | 91862008  | 91862008 | G       | A       | 45          | 100%     | T      | T      | SLC24A4     | rs941646          | s              |
| chr14           | 91978826  | 91978826 | T       | C       | 4           | 100%     | H      | H      | SLC24A4     | rs941650          | s              |

**Supplementary Figure 1** Sequence coverage of the disease linked interval (chr.14: bp 87,435,655 – 91,913,433).

The x-axis indicates the calculated coverage per target nucleotide and the y-axis represents the percentage of sequenced target nucleotides. Bars in bold highlight the observed sequencing depth of 25-, 20-, 10-, 5- and 1-fold. >91% of the target nucleotides were sequenced to a minimum depth of 10-fold.

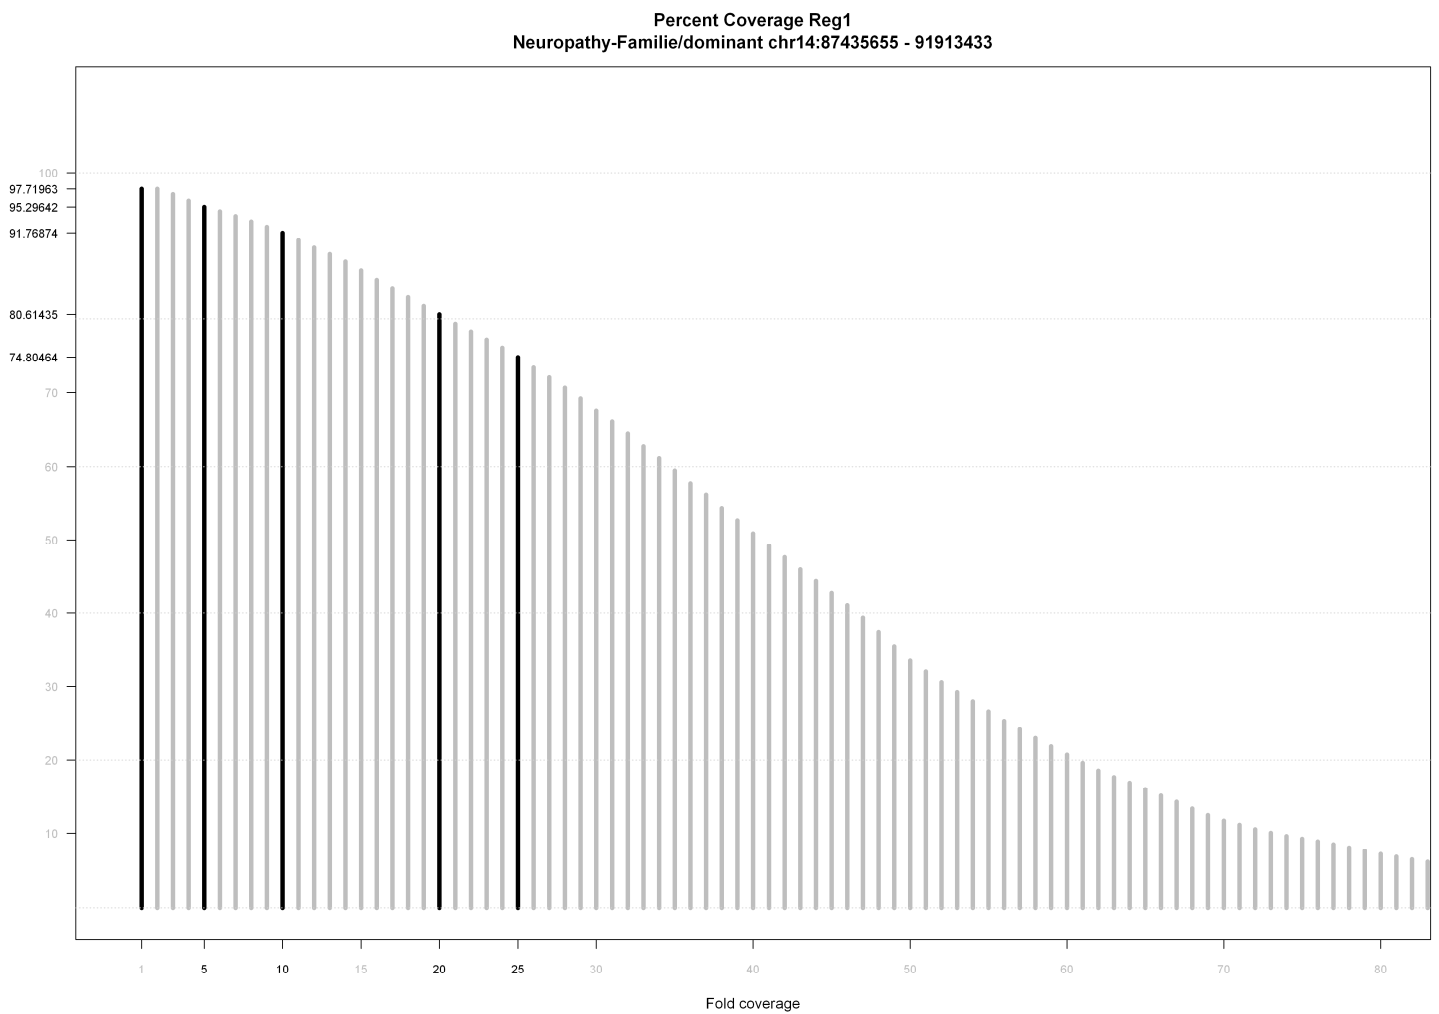





### Supplementary Figure 3 Evolutionary conservation of the FBLN5 protein.

The *FBLN5* sequence was compared to its orthologues and paralogues with VectorNTI software.

Human (NP\_006230.2), Orangutan (NP\_001125375.1), Chimpanzee (XP\_001145383.1), White-tufted-ear marmoset (XP\_002754249.1), Rhesus monkey (XP\_001092011.1), Dog (XP\_537350.2), Bovine (NP\_001014946.1), Rat (NP\_062026.2), Mouse (NP\_035942.1), Chicken (XP\_421323.1), Xenopus (NP\_001025619.1), Danio (NP\_001005979.1), *FBLN1* (NP\_006477.2), *FBLN2* (NP\_001004019.1), *FBLN3* (NP\_001034438.1), *FBLN4* (NP\_058634.3), *FBLN6* (NP\_114141.2), *FBLN7* (NP\_694946.2). The arrows indicate mutation sites found in exons 4, 8 and 10.

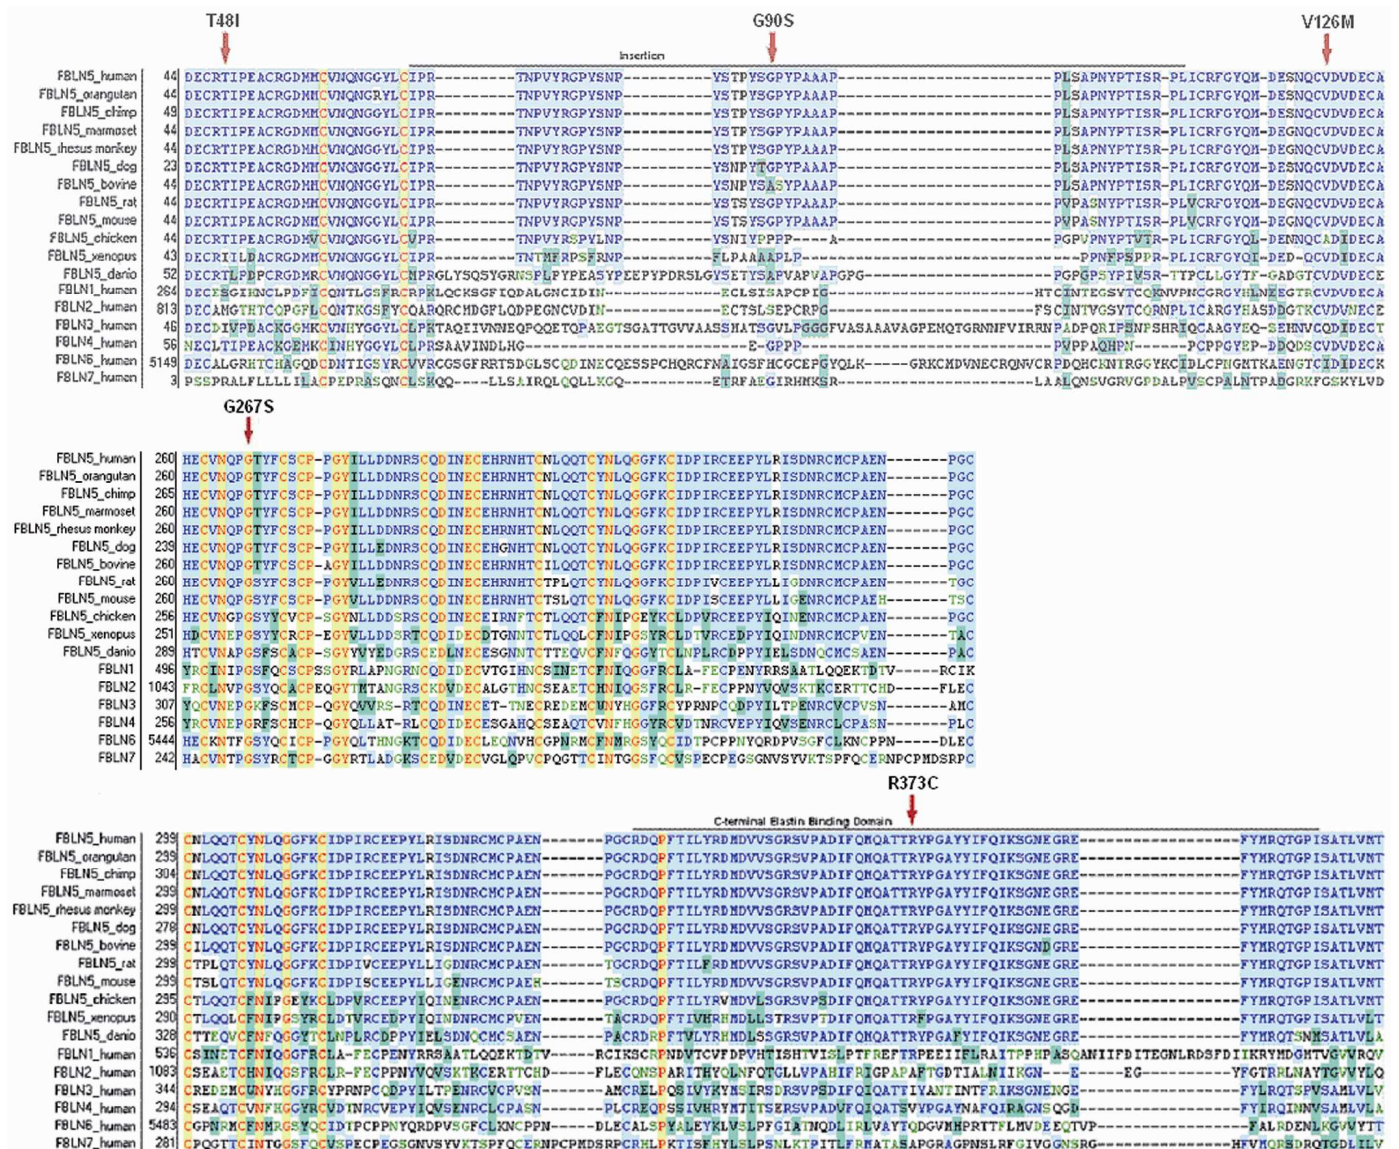

**Supplementary Figure 4** Simplified and schematic model of elastic fiber assembly.

*A.* Pericellular assembly of tropoelastin into globules and stabilizing through cross-linking by LOX. FBLN4 and LOX form together with tropoelastin a ternary complex. The binding of FBLN4 with LOX facilitates the cross-linking of tropoelastin. *B.* FBLN5 associates with elastin globules. *C.* FBLN5 facilitates direct high affinity binding of elastin on microfibrils. This is mutually inhibitory to the interaction of FBLN5 and tropoelastin due to the same or overlapping binding site. Fibrillin also disrupts FBLN4 binding to LOX and tropoelastin. FBLN4 and FBLN5 thus do not have compensatory roles in this process. Active LOX cross-links by coalescing elastin globules on microfibrils. *D.* LOX, FBLN4 and FBLN5 may remain associated with microfibrils or dissociate to begin a new cycle of assembly.

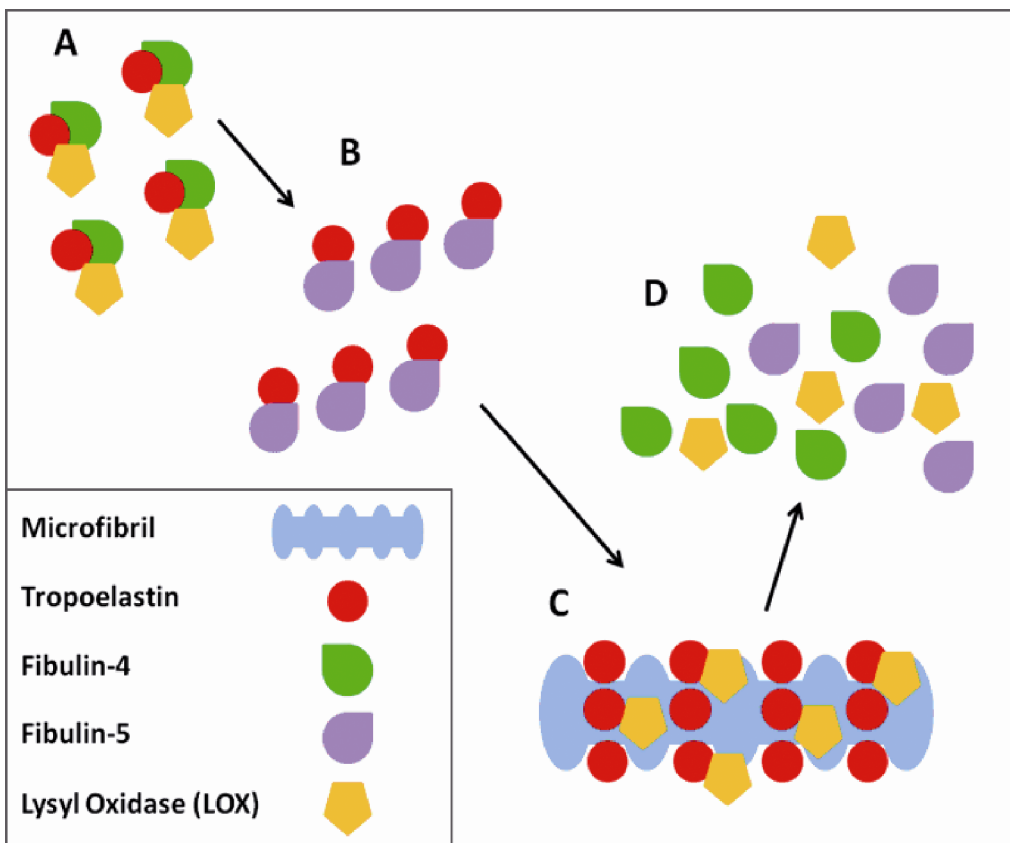

Supplement: NIHMS36997-supplement-1.pdf [file NIHMS36997-supplement-1.pdf]
